# Supplementary material for: What makes zeolitic imidazolate frameworks hydrophobic or hydrophilic? The impact of geometry and functionalization on water adsorption
Source: Royal Society of Chemistry journal article supplement (doi:10.1039/c3cp54292k), 2013-12-20
Supplement: c3cp54292k.pdf [file c3cp54292k.pdf]

Supporting information for

## What Makes Zeolitic Imidazolate Frameworks Hydrophobic or Hydrophilic? Impact of Geometry and Functionalization on Water Adsorption

*Aurélie U. Ortiz, Alexy P. Freitas, Anne Boutin,  
Alain H. Fuchs and François-Xavier Coudert*

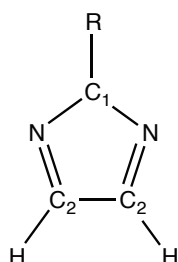

|                      | SALEM-2   | ZIF-8                  | ZIF-Cl     | ZIF-90      | ZIF-65                 |
|----------------------|-----------|------------------------|------------|-------------|------------------------|
| <b>Zn</b>            | 1.10      | 1.10                   | 0.79       | 0.85        | 0.792                  |
| <b>N</b>             | -0.54     | -0.54                  | -0.17      | -0.30       | -0.12                  |
| <b>C<sub>1</sub></b> | 0.64      | 0.64                   | 0.47       | 0.48        | 0.45                   |
| <b>C<sub>2</sub></b> | -0.08     | -0.08                  | -0.32      | -0.20       | -0.30                  |
| <b>H</b>             | 0.144     | 0.144                  | 0.1725     | 0.14725     | 0.172                  |
| <b>-R</b>            | <b>-H</b> | <b>-CH<sub>3</sub></b> | <b>-Cl</b> | <b>-HCO</b> | <b>-NO<sub>2</sub></b> |
| <b>C</b>             | —         | -0.67                  | —          | 0.30        | —                      |
| <b>O</b>             | —         | —                      | —          | -0.52       | -0.53                  |
| <b>H</b>             | -0.238*   | 0.144                  | —          | -0.03       | —                      |
| <b>N</b>             | —         | —                      | —          | —           | 0.71                   |
| <b>Cl</b>            | —         | —                      | -0.23      | —           | —                      |

**Table S1.** Atomic point charges used to model the various ZIFs studied in this work.

\* Since SALEM-2 was not studied by Amrouche et al. (ref. 44), we approximated the charge of the H atom by the total charge of the CH<sub>3</sub> group in closely related ZIF-8. We checked that this approximation does not impact the resulting adsorption isotherm and heat of adsorption, because the water-ZIF interactions are dominated by dispersive interactions in this hydrophobic material.

| ZIF-7          |        |
|----------------|--------|
| Zn             | 1.10   |
| N              | -0.465 |
| C <sub>1</sub> | 0.39   |
| C <sub>2</sub> | 0.00   |
| C <sub>3</sub> | -0.120 |
| H              | 0.094  |

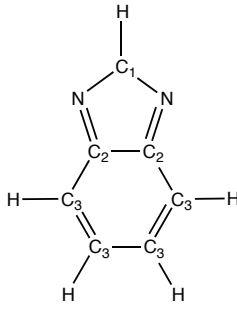

**Table S2.** Atomic point charges used to model ZIF-7.

| Atom | $\epsilon$ (K) | $\sigma$ (Å) |
|------|----------------|--------------|
| Zn   | 43.084         | 2.338        |
| N    | 23.974         | 3.997        |
| O    | 20.847         | 3.118        |
| Cl   | 78.872         | 3.516        |
| C    | 36.483         | 3.259        |
| H    | 15.288         | 2.440        |

**Table S3.** Van der Waals parameters used for ZIF atoms.

| <table border="1"> <thead> <tr> <th><math>\epsilon</math> (K)</th> <th><math>\sigma</math> (Å)</th> </tr> </thead> <tbody> <tr> <td>H<sub>2</sub>O</td> <td>78.03 3.1536</td> </tr> </tbody> </table> |                        |         |         |         |                  | $\epsilon$ (K) | $\sigma$ (Å) | H <sub>2</sub> O | 78.03 3.1536 |
|-------------------------------------------------------------------------------------------------------------------------------------------------------------------------------------------------------|------------------------|---------|---------|---------|------------------|----------------|--------------|------------------|--------------|
| $\epsilon$ (K)                                                                                                                                                                                        | $\sigma$ (Å)           |         |         |         |                  |                |              |                  |              |
| H <sub>2</sub> O                                                                                                                                                                                      | 78.03 3.1536           |         |         |         |                  |                |              |                  |              |
| $r_{\text{O-H}}$                                                                                                                                                                                      | $\widehat{\text{HOH}}$ | $q$ (O) | $q$ (H) | $q$ (M) | $r_{\text{O-M}}$ |                |              |                  |              |
| 0.9572 Å                                                                                                                                                                                              | 104.52°                | 0       | 0.52    | -1.04   | 0.15 Å           |                |              |                  |              |

**Table S4.** Parameters of the water TIP4P model.

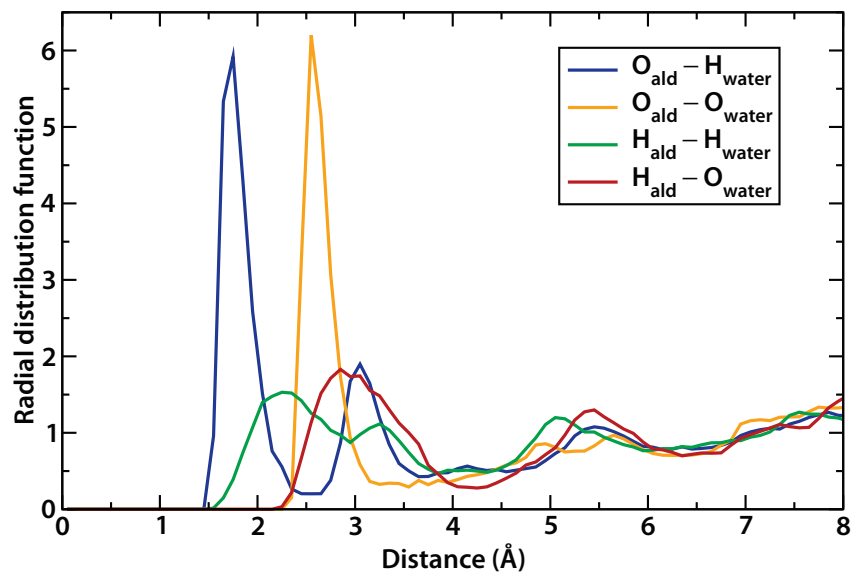

**Figure S1.** Aldehyde–water radial distribution functions for water adsorbed in ZIF-90 at  $P = 0.2$  kPa.
